# Supplementary material
Source: PubMed Central journal article supplement (PMC4019712)
Supplement: NIHMS576155-supplement-01.pdf [file NIHMS576155-supplement-01.pdf]

## Supplemental Information

## Supplemental Figures:

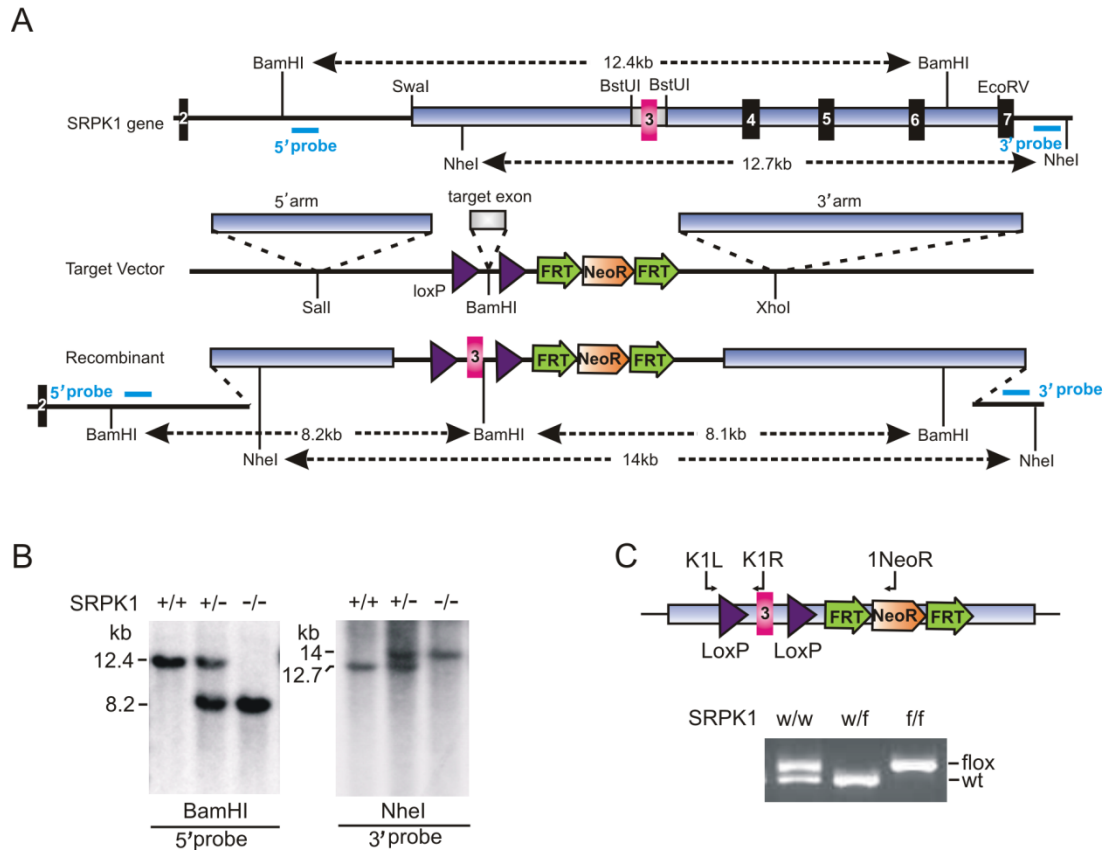

**Figure S1, Generation of SRPK1 conditional knockout mice, Related to Figure 1**

A. Schematic presentation of the mouse SRPK1 gene and the targeting strategy.

B. Southern blot analysis of targeted ES cells, confirming site-specific integration of the targeting construct by using 5' and 3' probes outside the targeting fragments.

C. PCR genotyping of germ line transmitted mice. Locations of specific primers are indicated on the diagram above.

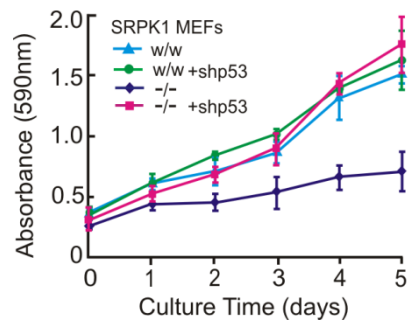

**Figure S2, Immortalization of SRPK1 conditional knockout MEFs with p53 RNAi, Related to Figure 2**

Wild type and SRPK1<sup>-/-</sup> MEFs were immortalized with p53 RNAi. Cell growth was monitored by the MTT assay based on absorbance at 590nm. SRPK1 deletion retarded cell growth and immortalization by p53 RNAi prevented such effect. Data are shown as mean ±SD.

A

|                  | Gene Symbol (Name) | Peptide Sequence                                 | Phospho-Sites | 1st Experiment |            |      | 2nd Experiment |            |      |
|------------------|--------------------|--------------------------------------------------|---------------|----------------|------------|------|----------------|------------|------|
|                  |                    |                                                  |               | Heavy (WT)     | Light (KO) | L/H  | Heavy (WT)     | Light (KO) | L/H  |
| PI3K/Akt Pathway | Akt1               | SGSP <sup>S</sup> DNSGAEEMEVS <sup>L</sup> LAKPK | S126          | 2.90E+06       | 4.38E+06   | 1.51 | 1.22E+06       | 1.68E+06   | 1.51 |
|                  | Akt1               | TIT <sup>p</sup> PPDQDMSMECPVDSER                | T450          | 1.04E+07       | 1.49E+07   | 1.43 | —              | —          | —    |
|                  | Akt2               | TIT <sup>p</sup> PPDRYDSLPLELDQR                 | T450          | 1.02E+06       | 1.45E+06   | 1.42 | 1.20E+06       | 1.88E+06   | 1.57 |
|                  | IRS1               | RHS <sup>p</sup> SETFSAPTR                       | S1096         | 1.14E+07       | 1.66E+07   | 1.46 | 1.34E+07       | 3.35E+07   | 2.50 |
|                  | IRS1               | HS <sup>p</sup> ETFSAPTR                         | S1097         | 2.48E+06       | 3.63E+06   | 1.46 | 2.54E+06       | 8.45E+06   | 3.33 |
|                  | IRS1               | RS <sup>p</sup> EDLSNYASI                        | S1213         | 2.35E+06       | 4.06E+06   | 1.73 | —              | —          | —    |
|                  | IRS1               | AS <sup>p</sup> DSDGEGTMSRPA                     | S324          | 3.08E+06       | 5.64E+06   | 1.83 | —              | —          | —    |
|                  | IRS1               | QSYVDTS <sup>p</sup> PVAPVSYADMR                 | S999          | 1.06E+06       | 2.29E+06   | 2.16 | 7.41E+05       | 2.54E+06   | 3.43 |
|                  | PDPK1(PDK1)        | SQTEPGS <sup>p</sup> PGIPSGVSR                   | S37           | 9.52E+06       | 3.62E+07   | 3.80 | —              | —          | —    |
|                  | PDPK1(PDK1)        | ANS <sup>p</sup> FGTAQYVSPPELLTEK                | S244          | 5.77E+07       | 5.97E+07   | 1.03 | 4.11E+07       | 5.84E+07   | 1.42 |
|                  | PI3K3c2a           | SQ <sup>p</sup> LIIR                             | S339          | —              | —          | —    | 4.47E+05       | 1.01E+06   | 2.26 |
|                  | PI3K3r1            | SREYDRL <sup>p</sup> EYETR                       | Y467          | —              | —          | —    | 1.61E+05       | 8.97E+05   | 5.57 |
|                  | PI3K3r4            | ANAVDQSHLD <sup>p</sup> SQK                      | S813          | 2.01E+06       | 4.40E+06   | 2.19 | —              | —          | —    |
|                  | PPP2r5d            | QSP <sup>p</sup> PFNLNK                          | S82           | 1.87E+07       | 2.75E+07   | 1.47 | 9.95E+06       | 2.17E+07   | 2.18 |

|              | Gene Symbol (Name) | Peptide Sequence                                    | Phospho-Sites | Heavy (WT) | Light (KO) | L/H  | Heavy (WT) | Light (KO) | L/H  |
|--------------|--------------------|-----------------------------------------------------|---------------|------------|------------|------|------------|------------|------|
| mTOR Pathway | mTOR               | TD <sup>p</sup> YSAGQSVEILDGVELGEPAAHKK             | S2448         | 5.00E+05   | 9.34E+05   | 1.87 | —          | —          | —    |
|              | Rictor             | S <sup>p</sup> NSVSLVPPGSSHTLPR                     | S1281         | 2.11E+06   | 4.12E+06   | 1.95 | —          | —          | —    |
|              | Rictor             | SN <sup>p</sup> VSLVPPGSSHTLPR                      | S1283         | 1.85E+06   | 3.78E+06   | 2.04 | —          | —          | —    |
|              | Rictor             | ALS <sup>p</sup> YAS <sup>p</sup> LDKEDLLSPINHNTLQR | S1387         | —          | —          | —    | 5.01E+06   | 8.46E+06   | 1.69 |
|              | Tsc1               | GV <sup>p</sup> IFGGQLPPYDHLFEVALPK                 | S591          | —          | —          | —    | 4.75E+05   | 9.47E+05   | 1.99 |

|                       | Gene Symbol (Name) | Peptide Sequence                                                    | Phospho-Sites | Heavy (WT) | Light (KO) | L/H  | Heavy (WT) | Light (KO) | L/H  |
|-----------------------|--------------------|---------------------------------------------------------------------|---------------|------------|------------|------|------------|------------|------|
| Translational Control | eIF4E-BP1          | VALGDGVQLPPGDY <sup>p</sup> TPGGT <sup>p</sup> L<br>FSTTPGGTRIYYDRK | S34, T40      | —          | —          | —    | 2.29E+06   | 4.28E+06   | 1.87 |
|                       | eIF4E-BP1          | FLMECP <sup>RNS</sup> <sup>p</sup> PVA                              | S65           | 2.77E+07   | 4.25E+07   | 1.53 | —          | —          | —    |
|                       | eIF4E-BP1          | NS <sup>p</sup> VPVAK <sup>Tp</sup> PPKDLPAIPGVTSPTS                | S65, T69      | 2.01E+06   | 3.06E+06   | 1.52 | —          | —          | —    |
|                       | eIF4E-BP1          | RVALGDGVQLPPGDYSTTPGG<br>TLFST <sup>p</sup> TPGGTR                  | T45           | 3.20E+05   | 6.61E+05   | 2.07 | —          | —          | —    |
|                       | eIF4E-BP3          | LNL <sup>T</sup> <sup>p</sup> PK                                    | S1678         | 1.19E+08   | 1.61E+08   | 1.35 | 5.96E+06   | 1.31E+07   | 2.20 |
|                       | eIF4E-BP3          | TGGGGGASG <sup>p</sup> DEDEVSEVESFI<br>LDQEDLDNPVLK                 | S99           | —          | —          | —    | 4.08E+05   | 1.03E+06   | 2.52 |
|                       | eIF4ENIF1          | SG <sup>p</sup> PLEKDSGLR                                           | S137          | —          | —          | —    | 3.06E+06   | 7.78E+06   | 2.54 |
|                       | eIF4ENIF1          | SS <sup>p</sup> LGSTPHEELER                                         | S352          | 8.35E+06   | 9.79E+06   | 1.17 | 1.53E+06   | 2.23E+06   | 1.46 |
|                       | RPS6Ka1 (p90RSK)   | TPRD <sup>p</sup> SPGIPPSAGAHQLFR                                   | S352          | —          | —          | —    | 1.55E+06   | 5.62E+06   | 3.63 |
|                       | RPS6Ka1            | KLPST <sup>p</sup> TL                                               | T722          | —          | —          | —    | 6.23E+05   | 2.25E+06   | 3.61 |
|                       | RPS6KA4 (MSK2)     | SELDVGNFAEEFTRLEPVY <sup>p</sup> SPAG<br>SPPPGDPDR                  | S343, S347    | 9.18E+05   | 1.41E+06   | 1.54 | 1.76E+06   | 4.22E+06   | 2.40 |
|                       | RPS6KA4            | SSPPLRT <sup>p</sup> PDVLESSGPAVR                                   | T687          | —          | —          | —    | 6.88E+06   | 1.44E+07   | 2.09 |
|                       | RPS6Kb1 (p70S6K)   | S <sup>p</sup> PDDSTLSEANQVFLGFTYVAPS<br>VLESVKEK                   | S394          | —          | —          | —    | 9.18E+04   | 2.73E+05   | 2.97 |
|                       | RPS6Kb1            | TPV <sup>p</sup> SPVKFSPGDFWGR                                      | S447          | 3.18E+06   | 3.42E+06   | 1.08 | 8.87E+06   | 1.59E+07   | 1.79 |

B

|              | Gene Symbol (Name) | Peptide Sequence                  | Phospho-Sites | Heavy (WT) | Light (KO) | L/H  | Heavy (WT) | Light (KO) | L/H  |
|--------------|--------------------|-----------------------------------|---------------|------------|------------|------|------------|------------|------|
| MAPK Pathway | Raf1 (c-Raf)       | RA <sup>p</sup> DDGKLTDDSSK       | S43           | 1.32E+07   | 1.38E+07   | 1.05 | 3.30E+06   | 5.04E+06   | 1.53 |
|              | MAPK1(ERK2)        | VADPHDHTGFLTEY <sup>p</sup> VATR  | Y185          | 3.02E+06   | 2.84E+06   | 0.94 | 1.89E+07   | 2.12E+07   | 1.12 |
|              | MAPK3(ERK1)        | IADPEHDHTGFLTEY <sup>p</sup> VATR | Y205          | 2.86E+07   | 3.13E+07   | 1.09 | 4.67E+06   | 5.51E+06   | 1.18 |
|              | MAP2k4             | TH <sup>p</sup> SLESSGK           | S78           | 1.51E+07   | 1.49E+07   | 0.99 | 1.71E+07   | 2.14E+07   | 1.25 |
|              | MAP3k7             | S <sup>p</sup> IQDLTVGTGTEPGQVSSR | S412          | 1.60E+07   | 1.78E+07   | 1.11 | 9.81E+06   | 1.02E+07   | 1.04 |
|              | MAP4k4             | RD <sup>p</sup> PLQGGGQQNSQAGQR   | S629          | 9.68E+06   | 1.52E+07   | 1.57 | 1.63E+06   | 2.66E+06   | 1.63 |
|              | MAP4k4             | NS <sup>p</sup> TSSIEPR           | S646          | 3.50E+06   | 4.96E+06   | 1.42 | —          | —          | —    |

**Figure S3, Phosphoproteomic analysis of SRPK1-deleted MEFs by SILAC, Related to Figure 3**

A. Activation of multiple components in the Akt pathway scored from two independent SILAC experiments.

B. The phosphorylation status of representative components in the MAPK pathway.

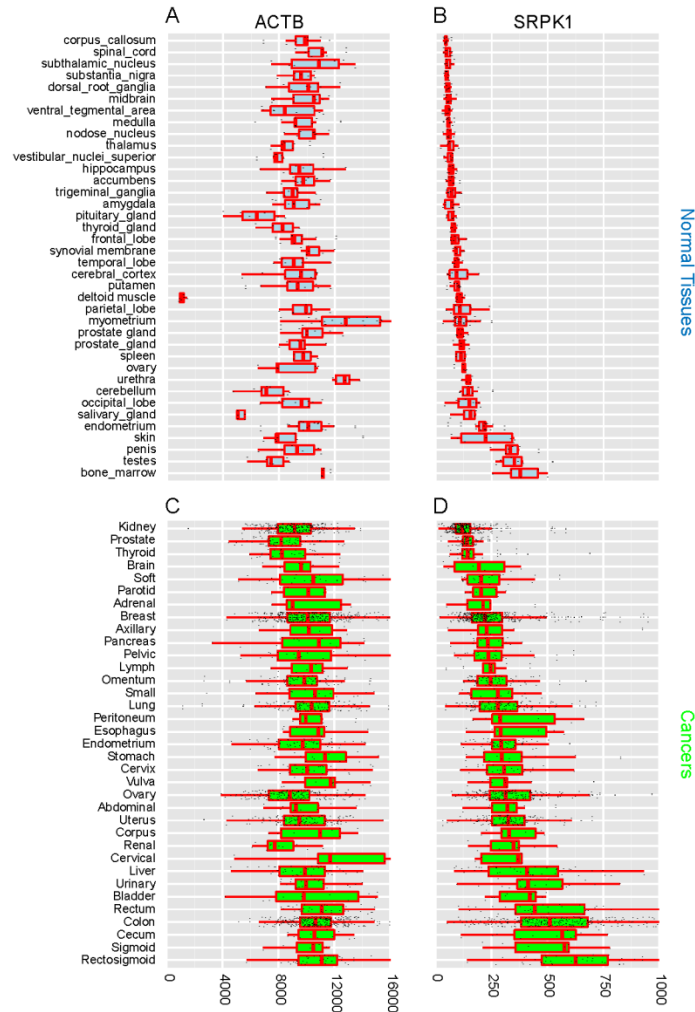

**Figure S4, Expression of SRPK1 in normal and cancer tissues in humans, Related to Figure 7**

A and B. Boxplots of  $\beta$ -actin and SRPK1 expression in different normal human tissues (data extracted from GSE7307). The expression of SRPK1 is more tightly controlled than  $\beta$ -actin in normal human tissues.

C and D. Boxplots of  $\beta$ -actin and SRPK1 expression in different human cancers (data extracted from GSE2109). SRPK1 expression is highly variable in different human cancers.

Y-axis shows normalized probeset signals from the Affymetrix U133 plus 2.0 arrays. Each tissue/cancer group is required to have at least 5 samples.
